# Supplementary material
Source: PubMed Central journal article supplement (PMC7033659)
Supplement: am9b20615_si_001.pdf [file am9b20615_si_001.pdf]

# All-Polymer Conducting Fibers and 3D Prints via Melt Processing and Templated Polymerization

*Anna I. Hofmann,<sup>a\*</sup>† Ida Östergren,<sup>a†</sup> Youngseok Kim,<sup>b</sup> Sven Fauth,<sup>a</sup> Mariavittoria  
Craighero,<sup>a</sup> Myung Han Yoon,<sup>b</sup> Anja Lund,<sup>a</sup> Christian Müller<sup>a\*</sup>*

<sup>a</sup> Department of Chemistry and Chemical Engineering, Chalmers University of Technology,  
41296 Göteborg, Sweden

e-mail: [hofanna@chalmers.se](mailto:hofanna@chalmers.se); [christian.muller@chalmers.se](mailto:christian.muller@chalmers.se)

<sup>b</sup> School of Materials Science and Engineering, Gwangju Institute of Science and  
Technology, Gwangju 61005, Republic of Korea

†These authors contributed equally.

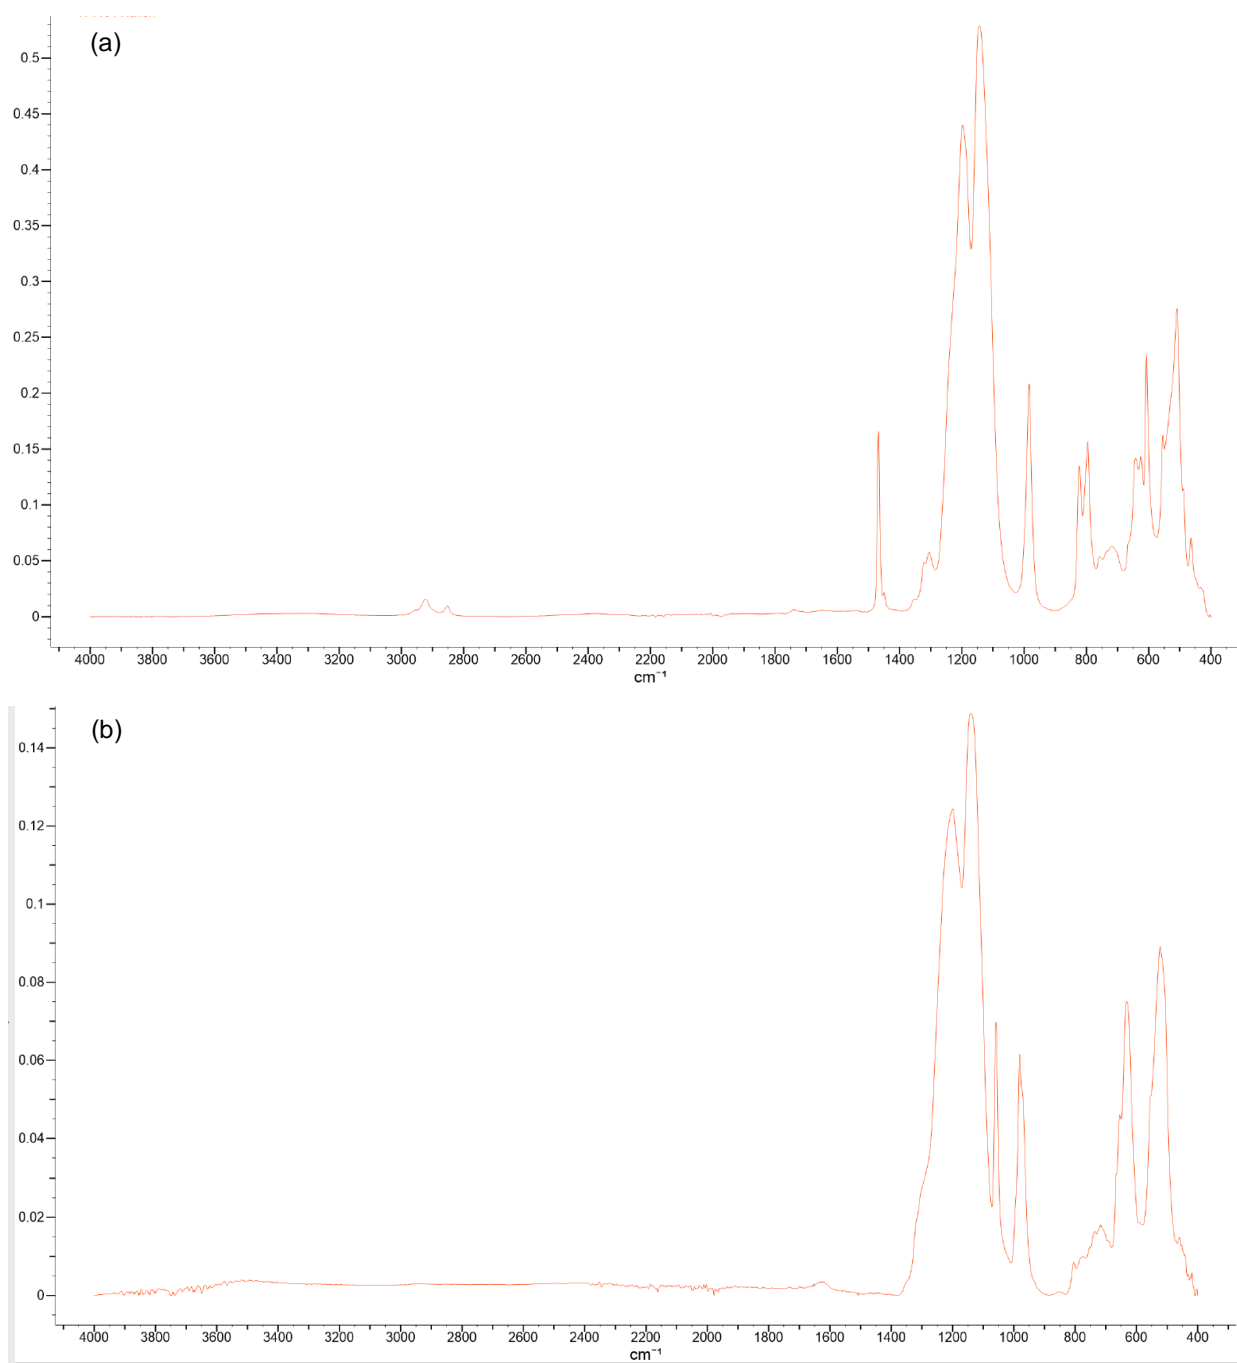

**Figure S1.** FTIR spectra of (a) the Nafion precursor and (b) the activated Nafion. The decrease of the band at ca. 1470  $\text{cm}^{-1}$  (asymmetric stretching of O=S=O in  $-\text{SO}_2\text{F}$ ) and the increase of the band at around 1050  $\text{cm}^{-1}$  (asymmetric stretching of O=S=O in  $-\text{SO}_3$ ) confirms the transformation of the sulfonyl fluoride groups into sulfonic acid groups.



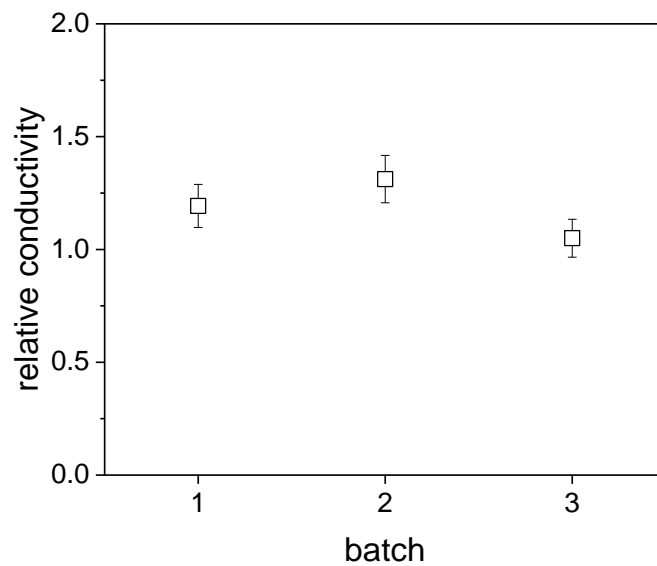

**Figure S2.** Relative conductivity of three different batches PEDOT:Nafion after one year storage under ambient conditions with respect to the initial conductivity, measured right after synthesis. Every measurement point represents the average of three values, measured on different positions of a PEDOT:Nafion filament from the same respective batch.

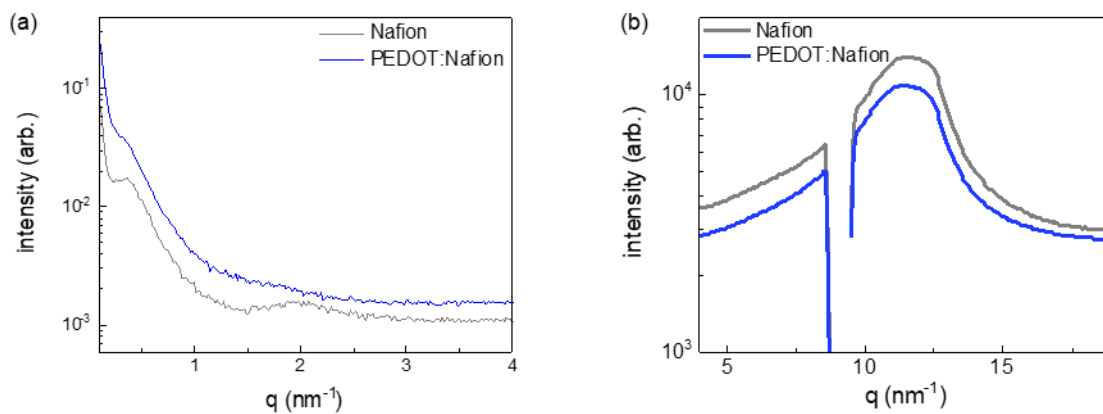

**Figure S3.** (a) SAXS and (b) WAXS diffractograms of melt processed activated Nafion (gray line) and PEDOT:Nafion (blue line).

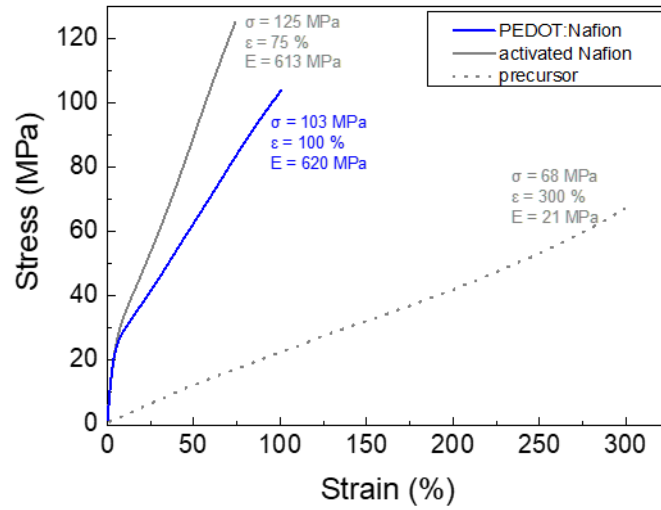

**Figure S4.** Mechanical properties of melt spun fibers of the Nafion precursor, activated Nafion and of PEDOT:Nafion measured by tensile testing.

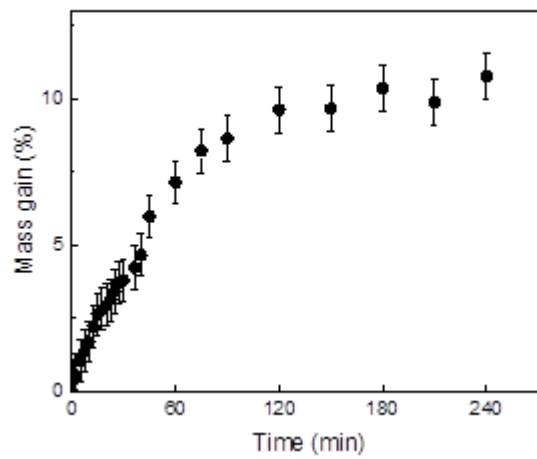

**Figure S5.** Mass gain of bulk PEDOT:Nafion placed in a water bath over time.

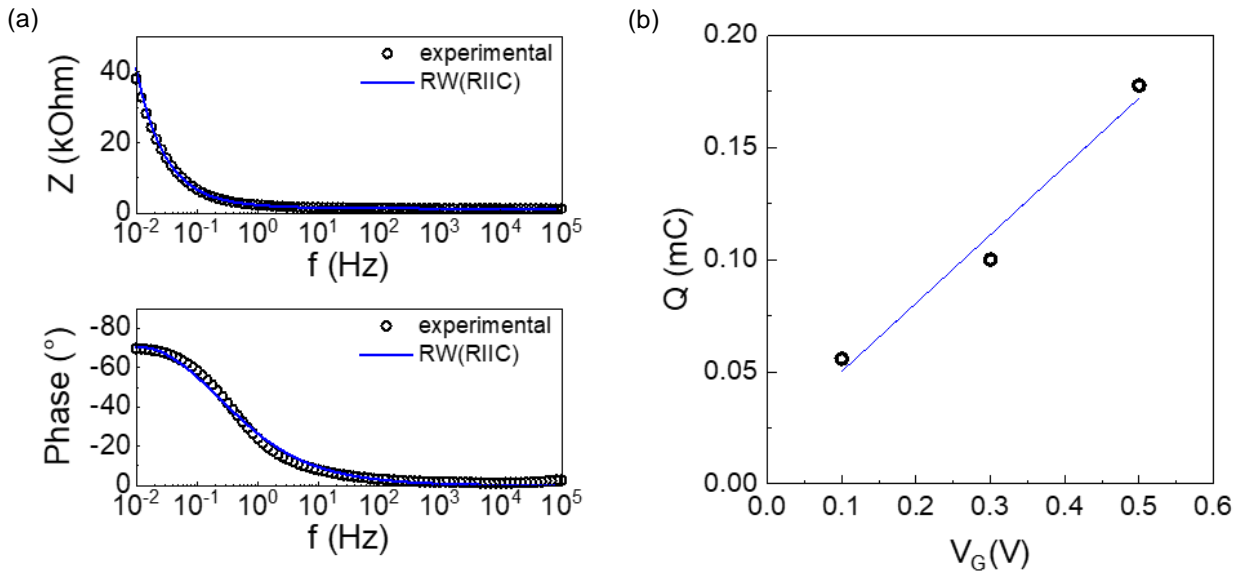

**Figure S6.** (a) Impedance spectroscopy of a PEDOT:Nafion fiber ( $L=1.9\text{mm}$ ,  $d=150\ \mu\text{m}$ ,  $V=3.4 \cdot 10^{-5}\ \text{cm}^3$ ), fitted with a  $R_s W(R_p IIC)$  equivalent circuit,  $R_s=1395\ \text{Ohm}$ ,  $W=0.00037$ ,  $R_p=2 \cdot 10^5\ \text{Ohm}$ ,  $C = 0.0005\ \text{F}$ ,  $C^*= 14.7\ \text{Fcm}^{-3}$ . (b) Gate current transient of a PEDOT:Nafion fiber ( $L=2\text{mm}$ ,  $d=0.2\text{mm}$ ), the fitted line corresponds to  $C = 0.0003\ \text{F}$  (x-intercept =  $-0.065\ \text{V}$ ,  $R^2 = 0.98$ ),  $C^*= 8.8\ \text{Fcm}^{-3}$ .

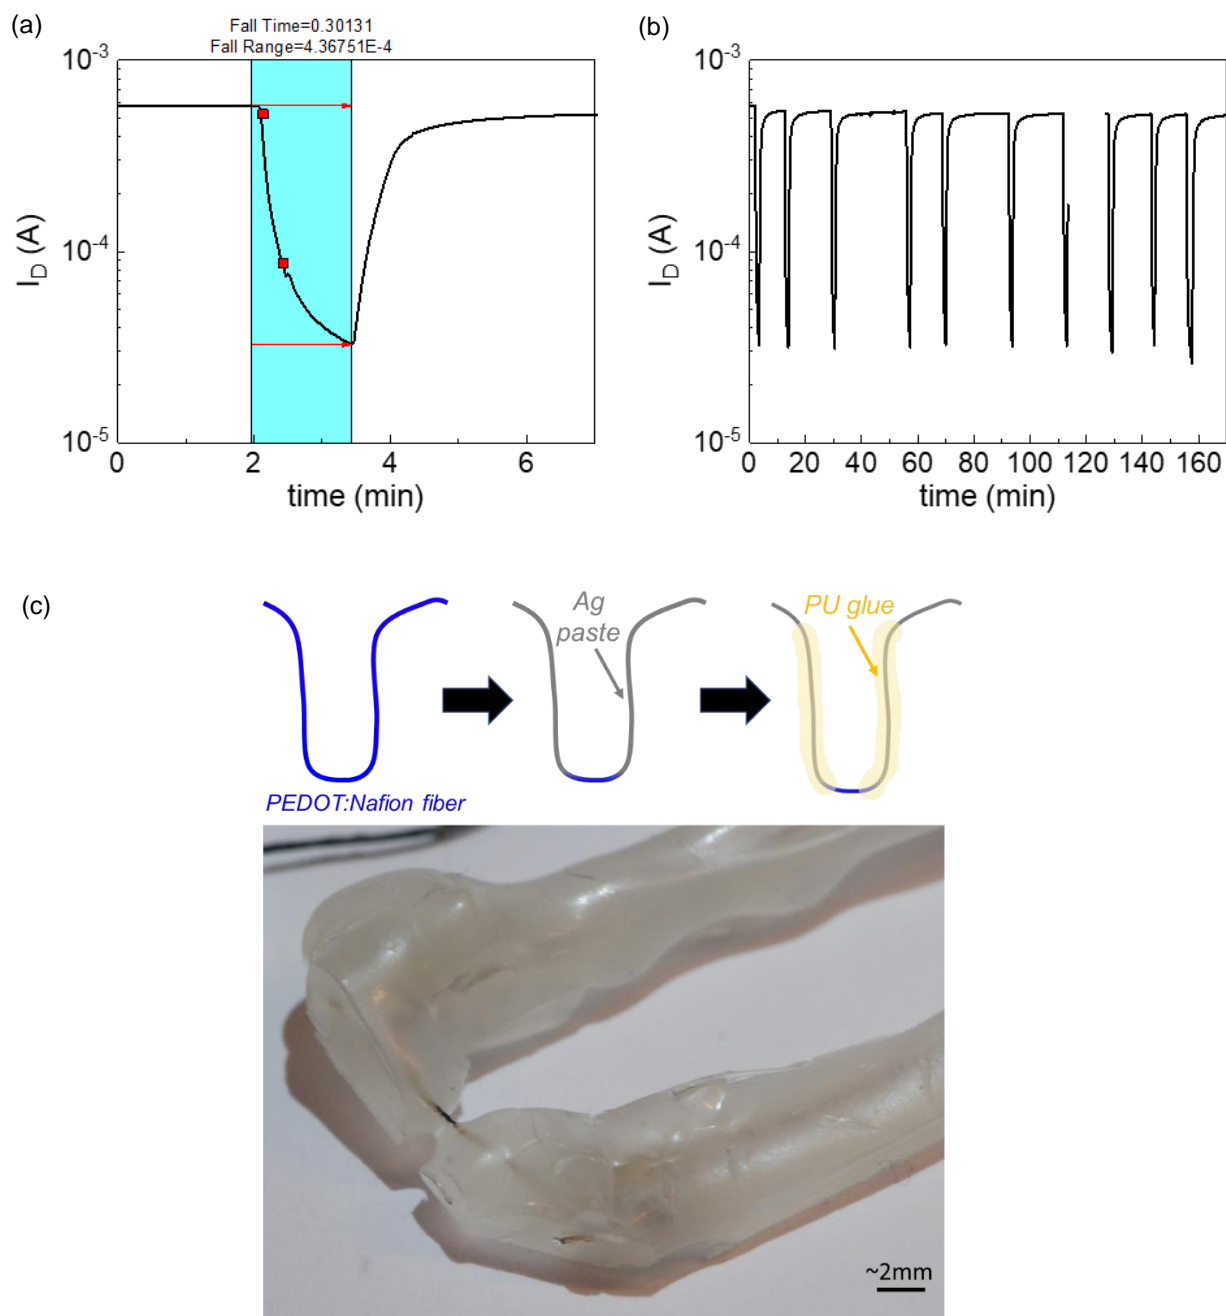

**Figure S7.** Time response of the drain current of a PEDOT:Nafion fiber OECT for a gate voltage pulse of 0.6 V (a) for one cycle and (b) over 10 cycles. (c) Schematic and photograph of a PEDOT:Nafion fiber OECT.

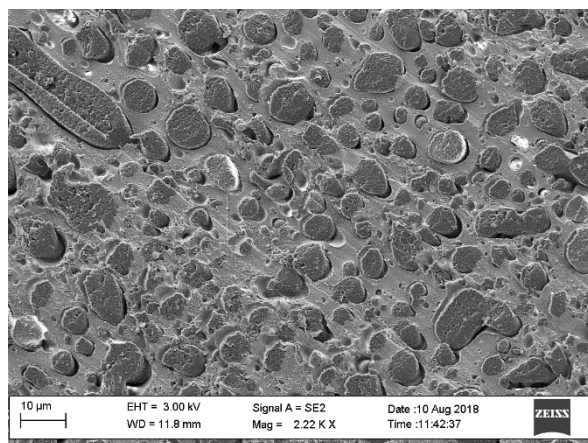

**Figure S8.** Scanning electron micrograph of a Nafion/ABS blend containing 30 wt% ABS.



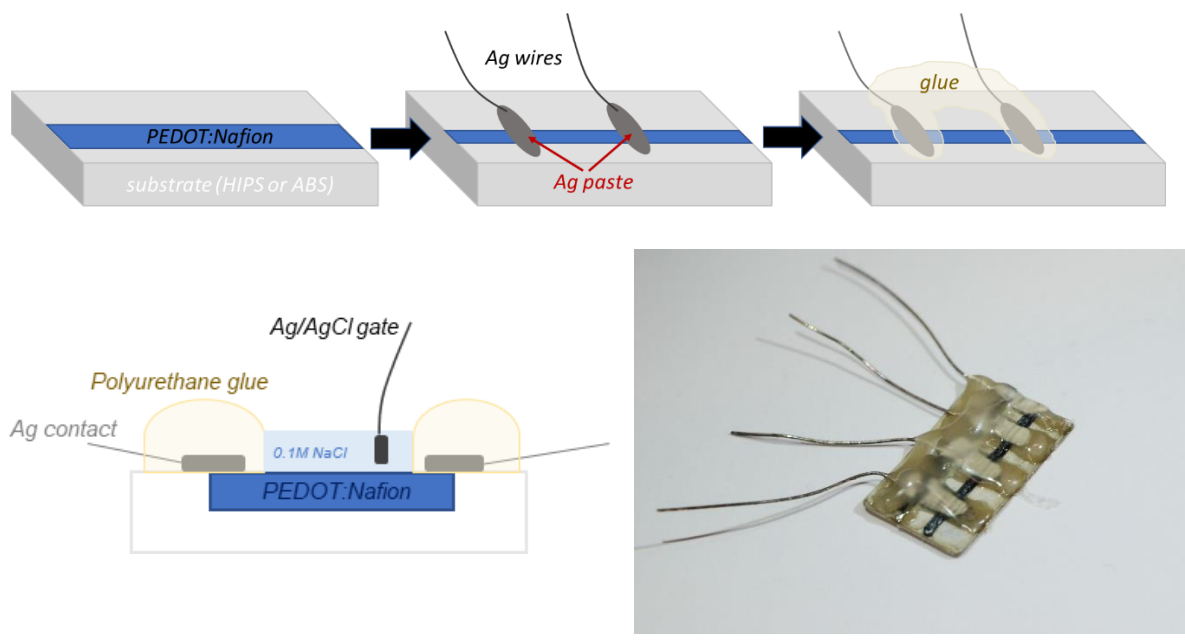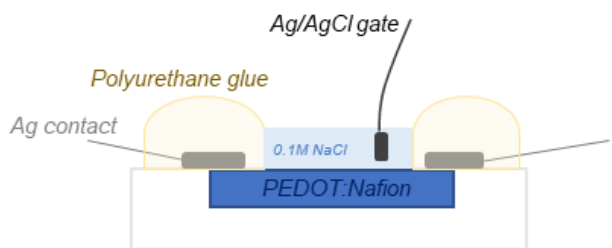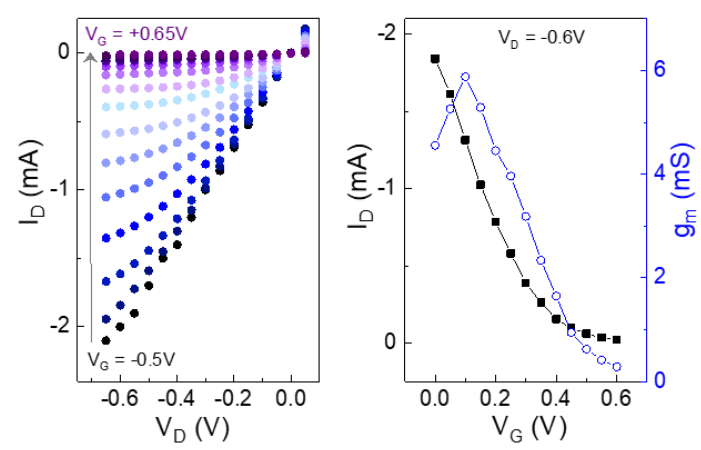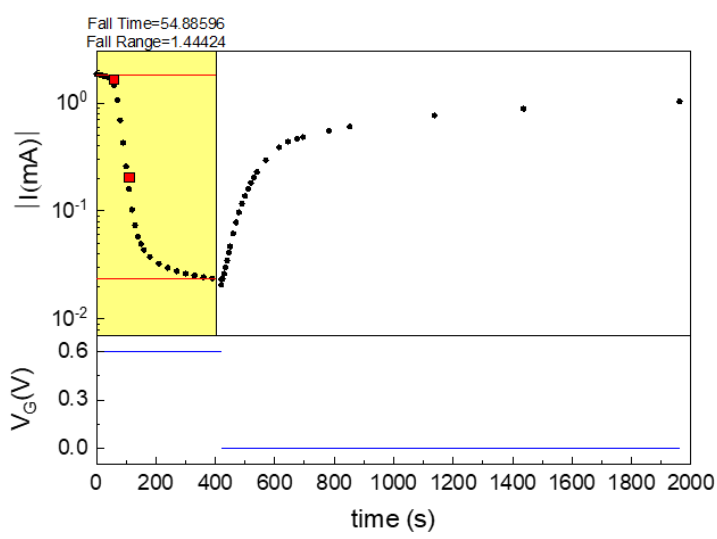

**Figure S9.** OECT design scheme, photograph, output characteristics and time response of a 3D printed PEDOT:Nafion line ( $L=1.5$  mm,  $d=30$   $\mu\text{m}$ ,  $W=1$  mm).
